# Supplementary material
Source: PubMed Central journal article supplement (PMC10362990)
Supplement: NIHMS1912127-supplement-Appendix.pdf [file NIHMS1912127-supplement-Appendix.pdf]

# Survey:

## Artificial Intelligence in Emergency Radiology (ER)

Trends, Perceptions, and Expectations

Dear ASER Member,

We are conducting this survey to help us better understand current practices, perceptions, trends, and expectations among ASER members with respect to emergency radiology-focused artificial intelligence (AI) tools. If you have already completed this survey, we thank you for your participation. If not, we encourage you to take part. Your responses are voluntary and anonymous and the survey is expected to take approximately 15 minutes of your time.

Thank you for your participation!

Sincerely,

The ASER AI Expert Panel  
ASER Research Committee
